# Supplementary material
Source: publisher site journal article supplement (https://www.dovepress.com/article/244678)
Supplement: Supplementary file 1 [file get_supplementary_file.php]

**Supporting information**

**Simple approaches for the synthesis of AgNPs in solution and solid phase using modified methoxypolyethylene glycol and evaluation of their antimicrobial activity**

**Ayman El-Faham*, Hessa H. Al-Rasheed, Essam N. Sholkamy, Sameh M. Osman, Zeid A. AL Othman**


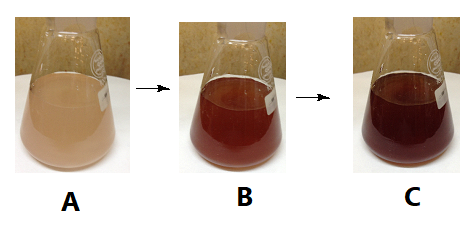


**Figure S1** Changing the color during formation of AgNPs using mPEGTH2; A) after 2min from addition of AgNO3 solution; B) after 5 min from addition of Ag solution; C) after 15 min from addition of Ag solution.


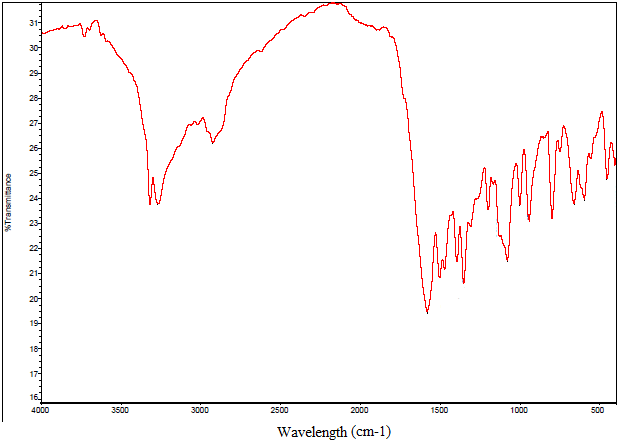


**Figure S2** FTIR spectra for mPEGTH2.

**Figure S3** FTIR spectra for mPEGTH2-AgNPs.
